# Supplementary material for: Patients expectations and fulfilment of expectations before and after treatment for suspected coronary artery disease assessed with a newly developed questionnaire in combination with established health-related quality of life questionnaires
Source: PubMed Central journal article supplement — Open Heart. 2017 Mar 6;4(1):e000529. doi: 10.1136/openhrt-2016-000529 (PMC5495177; doi:10.1136/openhrt-2016-000529), 2017-03-06
Supplement: openhrt-2016-000529supp001.pdf [file openhrt-2016-000529supp001.pdf]

# FRÅGEFORMULÄR OM FÖRVÄNTNINGAR INFÖR KRANSKÄRLSRÖNTGEN

## Information om formuläret:

Med dessa frågor vill vi ta reda på vilka förväntningar Du har på Din kommande undersökning, vård och behandling.

## Instruktion om hur Du ska fylla i formuläret:

Besvara frågorna med ett kryss i den ruta som Du tycker stämmer bäst in på Dig. Om du är osäker välj då det alternativ som är närmast.

### 1. Vilken är enligt Din uppfattning den främsta anledningen till att Du ska genomgå en kranskärlsundersökning?

#### Besvara bara **ETT** av följande alternativ.

- |                                                                                                                            |                          |
|----------------------------------------------------------------------------------------------------------------------------|--------------------------|
| a. Att undersöka om det finns förändringar i mitt hjärta som kan utgöra risk för mitt framtida liv.                        | <input type="checkbox"/> |
| b. Att undersöka vad som orsakar mina besvär (andfåddhet, hjärtklappning, ont/tryck i bröstet etc.).                       | <input type="checkbox"/> |
| c. Att undersöka om något ingrepp (ballongvidgning eller bypassoperation) kan utföras för att mina besvär skall försvinna. | <input type="checkbox"/> |
| d. Att undersöka om mitt hjärta är så pass friskt att jag kan genomgå annan planerad operation (ej hjärtat).               | <input type="checkbox"/> |
| e. Jag skall utredas inför en hjärtklaffsoperation.                                                                        | <input type="checkbox"/> |

### 2. Vad betyder de besvär eller de undersökningsfynd som föranleder den planerade kranskärlsundersökningen för Dig.

#### Besvara **ALLA** av nedanstående frågor a - g med det alternativ som stämmer bäst för Dig

|                                                         | Instämmer helt           | Instämmer nästan helt    | Instämmer delvis         | Instämmer inte alls      |
|---------------------------------------------------------|--------------------------|--------------------------|--------------------------|--------------------------|
| a. Jag har inga besvär.                                 | <input type="checkbox"/> | <input type="checkbox"/> | <input type="checkbox"/> | <input type="checkbox"/> |
| b. De påverkar mig inte särskilt mycket.                | <input type="checkbox"/> | <input type="checkbox"/> | <input type="checkbox"/> | <input type="checkbox"/> |
| c. Jag är begränsad i min förmåga att vara aktiv.       | <input type="checkbox"/> | <input type="checkbox"/> | <input type="checkbox"/> | <input type="checkbox"/> |
| d. De innebär ett kroppsligt lidande.                   | <input type="checkbox"/> | <input type="checkbox"/> | <input type="checkbox"/> | <input type="checkbox"/> |
| e. Mina anhöriga är oroliga.                            | <input type="checkbox"/> | <input type="checkbox"/> | <input type="checkbox"/> | <input type="checkbox"/> |
| f. Mina relationer till släkt och vänner påverkas.      | <input type="checkbox"/> | <input type="checkbox"/> | <input type="checkbox"/> | <input type="checkbox"/> |
| g. Jag är orolig för min framtida hälsa och överlevnad. | <input type="checkbox"/> | <input type="checkbox"/> | <input type="checkbox"/> | <input type="checkbox"/> |

# FRÅGEFORMULÄR OM FÖRVÄNTNINGAR INFÖR KRANSKÄRLSRÖNTGEN

## 3. Vad förväntar du Dig att kranskärlsundersökningen kommer att visa?

**Besvara bara ETT av följande alternativ.**

- |                                                                                                                                                                                                   |                          |
|---------------------------------------------------------------------------------------------------------------------------------------------------------------------------------------------------|--------------------------|
| a. Att det inte finns några förträngningar.                                                                                                                                                       | <input type="checkbox"/> |
| b. Att det finns förträngningar i kranskärlen men att dessa inte är värre än att än att livsstilsförändring (bestående av ex rökstopp, fysiskträning och kostförändringar) räcker som behandling. | <input type="checkbox"/> |
| c. Att det finns förträngningar i kranskärlen som kan förklara mina besvär och att lämpligaste behandling är med läkemedel.                                                                       | <input type="checkbox"/> |
| d. Att det finns förträngningar i kranskärlen som är lämpliga att behandla med ballongvidgning.                                                                                                   | <input type="checkbox"/> |
| e. Att det finns förträngningar i kranskärlen som är lämpliga att behandla med bypassoperation.                                                                                                   | <input type="checkbox"/> |
| f. Att det finns förträngningar i mina kranskärl som inte går att behandla med något av ovanstående alternativ.                                                                                   | <input type="checkbox"/> |

## 4. a. Har Du besvär som hjärtklappning, andfåddhet eller smärta/tryck i bröstet?

**NEJ** Om **NEJ** fortsätt till fråga 5 →

**Ja** Om **Ja** besvara frågan nedan.

**b. Kan Du tänka Dig att leva med dina besvär, om besvären i sig inte medför ökad risk för framtida liv och hälsa?**

**Nej** Om **NEJ** fortsätt till fråga 5 →

**Ja** Om **Ja** besvara frågan nedan.

**Besvara bara ETT av följande alternativ.**

- |                                                                                                           |                          |
|-----------------------------------------------------------------------------------------------------------|--------------------------|
| c. Nej, jag kan inte tänka mig att leva med mina besvär då de gör att jag inte kan anstränga mig fysiskt. | <input type="checkbox"/> |
| d. Nej, jag kan inte tänka mig att leva med mina besvär de ger mig oro.                                   | <input type="checkbox"/> |
| e. Nej jag kan inte tänka mig att leva med mina besvär då de påminner mig om sjukdom.                     | <input type="checkbox"/> |

# FRÅGEFORMULÄR OM FÖRVÄNTNINGAR INFÖR KRANSKÄRLSRÖNTGEN

---

*Om kranskärlsröntgen visar att Du har förträngningar i Dina kranskärl*

## 5. Vad beskriver bäst din inställning till val av behandling?

*Besvara bara ETT av följande alternativ.*

- |                                                                                                                                                                  |                          |
|------------------------------------------------------------------------------------------------------------------------------------------------------------------|--------------------------|
| a. Jag har en bestämd uppfattning om vilken behandling jag föredrar.                                                                                             | <input type="checkbox"/> |
| b. Jag vill bli informerad om de olika behandlingsalternativ som finns och sedan tillsammans med ansvarig hjärtläkare besluta om vilken behandling jag skall få. | <input type="checkbox"/> |
| c. Jag vill att ansvarig hjärtläkare bestämmer vilken behandling jag skall få.                                                                                   | <input type="checkbox"/> |

*Om kranskärlsröntgen visar att Du har förträngningar i Dina kranskärl*

## 6. Vilket av nedanstående behandlingsalternativ skulle du då föredra?

*Besvara bara ETT av följande alternativ.*

- |                                                                                                            |                          |
|------------------------------------------------------------------------------------------------------------|--------------------------|
| a. Jag skulle föredra livsstilsförändring (bestående av ex rökstopp, fysisk träning och kostförändringar). | <input type="checkbox"/> |
| b. Jag skulle föredra enbart läkemedelsbehandling.                                                         | <input type="checkbox"/> |
| c. Jag skulle föredra ballongvidgning.                                                                     | <input type="checkbox"/> |
| d. Jag skulle föredra bypassoperation.                                                                     | <input type="checkbox"/> |

## 7. Hur ser du på att ändra Din livsstil (bestående av ex rökstopp, fysisk träning och kostförändringar)?

*Besvara bara ETT av följande alternativ.*

- |                                                                                                                         |                          |
|-------------------------------------------------------------------------------------------------------------------------|--------------------------|
| a. Jag skulle föredra att börja med livsstilsförändringar och tillgripa annan behandling senare om det blir nödvändigt. | <input type="checkbox"/> |
| b. Jag skulle föredra livsstilsförändringar enbart som ett komplement till annan behandling.                            | <input type="checkbox"/> |
| c. Jag vill inte göra några livsstilsförändringar.                                                                      | <input type="checkbox"/> |
| d. Jag har redan gjort allt som går att göra beträffande livsstilsförändringar.                                         | <input type="checkbox"/> |

# FRÅGEFORMULÄR OM FÖRVÄNTNINGAR INFÖR KRANSKÄRLSRÖNTGEN

## 8. Hur ser Du på en livslång behandling med läkemedel bestående av blodproppsförebyggande, blodfettssänkande och hjärtskyddande läkemedel?

**Besvara bara ETT av följande alternativ.**

- |                                                                                                   |                          |
|---------------------------------------------------------------------------------------------------|--------------------------|
| a. Jag vill inte ha någon behandling med läkemedel.                                               | <input type="checkbox"/> |
| b. Jag kan tänka mig att behandlas med läkemedel under en begränsad tid (behandlingstid ca 1 år). | <input type="checkbox"/> |
| c. Jag kan tänka mig livslång behandling med läkemedel.                                           | <input type="checkbox"/> |

## 9. Några frågor om information och tillgänglighet?

**Besvara ALLA av nedanstående alternativ a- c med det som stämmer bäst för Dig.**

|                                                                                                  | Instämmer helt           | Instämmer nästan helt    | Instämmer delvis         | Instämmer inte alls      |
|--------------------------------------------------------------------------------------------------|--------------------------|--------------------------|--------------------------|--------------------------|
| a. Jag litar på att jag kommer att få all den information jag behöver inför kommande behandling. | <input type="checkbox"/> | <input type="checkbox"/> | <input type="checkbox"/> | <input type="checkbox"/> |
| b. Jag litar på att jag kommer att få den behandling som mitt tillstånd kräver.                  | <input type="checkbox"/> | <input type="checkbox"/> | <input type="checkbox"/> | <input type="checkbox"/> |
| c. Jag litar på att jag kommer att få den behandling jag behöver i rimlig tid.                   | <input type="checkbox"/> | <input type="checkbox"/> | <input type="checkbox"/> | <input type="checkbox"/> |
| d. Jag litar på att jag bli väl bemött i samband med undersökning, vård och behandling.          | <input type="checkbox"/> | <input type="checkbox"/> | <input type="checkbox"/> | <input type="checkbox"/> |
| e. Jag litar på att ska kunna känna mig trygg i samband med undersökning vård och behandling.    | <input type="checkbox"/> | <input type="checkbox"/> | <input type="checkbox"/> | <input type="checkbox"/> |

## 10. Tror Du att Ditt nuvarande tillstånd kommer att påverkas av den eventuella behandling Du kommer få efter kranskärlsröntgen?

**Besvara bara ETT av nedanstående alternativ.**

- |                                                                                            |                          |
|--------------------------------------------------------------------------------------------|--------------------------|
| a. Jag förväntar mig att bli helt återställd.<br>Jag hoppas att bli helt bra.              | <input type="checkbox"/> |
| b. Jag förväntar mig att bli helt återställd.<br>Jag hoppas att bli helt bra.              | <input type="checkbox"/> |
| c. Jag förväntar mig enbart att bli delvis återställd.<br>Jag hoppas att bli något bättre. | <input type="checkbox"/> |
| d. Jag förväntar mig ingen förbättring.<br>Jag har inga förhoppningar på att bli bättre.   | <input type="checkbox"/> |

# FRÅGEFORMULÄR OM FÖRVÄNTNINGAR INFÖR KRANSKÄRLSRÖNTGEN

---

## 11. Vilket tänkbart resultat av undersökning och behandling är viktigast för Dig?

*Rangordna följande alternativ från 1- 6, skriv 1 för det som är viktigast 2 för det som är näst viktigast och så vidare.*

a. Att jag helt ska slippa de besvär jag har nu

b. Att jag skall kunna leva ett normalt liv och kunna utföra de aktiviteter jag önskar.

c. Att få reda på orsaken till mina besvär/tillstånd.

d. Att få veta om mina besvär/tillstånd innebär risk för framtida liv och hälsa.

e. Att få lindring av mina besvär.

d. Att minska den oro som mina besvär/tillstånd orsakar och att få känna mig trygg.

**Tack för Din medverkan!**
