# Supplementary material for: Patients expectations and fulfilment of expectations before and after treatment for suspected coronary artery disease assessed with a newly developed questionnaire in combination with established health-related quality of life questionnaires
Source: PubMed Central journal article supplement — Open Heart. 2017 Mar 6;4(1):e000529. doi: 10.1136/openhrt-2016-000529 (PMC5495177; doi:10.1136/openhrt-2016-000529), 2017-03-06
Supplement: openhrt-2016-000529supp002.pdf [file openhrt-2016-000529supp002.pdf]

# FRÅGEFORMULÄR OM FÖRVÄNTNINGAR

## - Uppföljning 6 månader

### EFTER KRANSKÄRLSRÖNTGEN

#### Information om formuläret:

Med dessa frågor vill vi ta reda på om de förväntningar du ha de inför kranskärldröntgen för ca 6 månader sedan har uppfyllts.

#### Instruktion om hur Du ska fylla i formuläret:

Besvara frågorna med ett kryss i den ruta som Du tycker stämmer bäst in på Dig. Om du är osäker välj då det alternativ som är närmast.

#### 1. Vilka/en behandling/ar har du erhållit som följd av den kranskärldröntgen du gjorde för ca 6 månader sedan?

- |                                                                                        |                          |
|----------------------------------------------------------------------------------------|--------------------------|
| a. Livsstilsförändring (bestående av ex rökstopp, fysiskträning och kostförändringar). | <input type="checkbox"/> |
| b. Behandling med enbart läkemedel.                                                    | <input type="checkbox"/> |
| c. Behandling med ballongvidgning                                                      | <input type="checkbox"/> |
| d. Behandling med bypassoperation.                                                     | <input type="checkbox"/> |
| e. Ingen behandling alls.                                                              | <input type="checkbox"/> |
| f. Annan behandling/operation (t.ex. klaffoperation).                                  | <input type="checkbox"/> |

#### 2. Hur har de förväntningar Du hade inför undersökning, vård och behandling uppfyllts?

Besvara ALLA av nedanstående frågor a – e med det alternativ som stämmer bäst för Dig

|                                                                                              | Instämmer helt           | Instämmer nästan helt    | Instämmer delvis         | Instämmer inte alls      |
|----------------------------------------------------------------------------------------------|--------------------------|--------------------------|--------------------------|--------------------------|
| a. De förväntningar jag hade på information inför undersökning och behandling har uppfyllts. | <input type="checkbox"/> | <input type="checkbox"/> | <input type="checkbox"/> | <input type="checkbox"/> |
| b. De förväntningar jag hade på min behandling har uppfyllts.                                | <input type="checkbox"/> | <input type="checkbox"/> | <input type="checkbox"/> | <input type="checkbox"/> |
| c. Jag har fått behandling i rimlig tid.                                                     | <input type="checkbox"/> | <input type="checkbox"/> | <input type="checkbox"/> | <input type="checkbox"/> |
| d. De förväntningar jag hade på det bemötande jag har fått har uppfyllts.                    | <input type="checkbox"/> | <input type="checkbox"/> | <input type="checkbox"/> | <input type="checkbox"/> |
| e. De förväntningar jag hade på att få känna mig trygg har uppfyllts.                        | <input type="checkbox"/> | <input type="checkbox"/> | <input type="checkbox"/> | <input type="checkbox"/> |

**FRÅGEFORMULÄR OM FÖRVÄNTNINGAR**  
– Uppföljning 6 månader  
EFTER KRANSKÄRLSRÖNTGEN

---

**3. Hur känner Du Dig nu sex månader efter att Du gjorde kranskärlsröntgen?**

*Besvara ALLA av nedanstående frågor a – d med det alternativ som stämmer bäst för Dig.*

|                                                                            | Instämmer<br>helt        | Instämmer<br>nästan helt | Instämmer<br>delvis      | Instämmer<br>inte alls   |
|----------------------------------------------------------------------------|--------------------------|--------------------------|--------------------------|--------------------------|
| a. Jag känner mig välinformerad.                                           | <input type="checkbox"/> | <input type="checkbox"/> | <input type="checkbox"/> | <input type="checkbox"/> |
| b. Jag känner att jag har blivit väl omhändertagen.                        | <input type="checkbox"/> | <input type="checkbox"/> | <input type="checkbox"/> | <input type="checkbox"/> |
| c. Jag känner att jag vet vart jag skall vända mig om jag skulle bli sämre | <input type="checkbox"/> | <input type="checkbox"/> | <input type="checkbox"/> | <input type="checkbox"/> |
| d. Jag känner mig Trygg.                                                   | <input type="checkbox"/> | <input type="checkbox"/> | <input type="checkbox"/> | <input type="checkbox"/> |

**4. Vad betyder de besvär som Du hade för 6 månader sedan idag?**

*Besvara ALLA av nedanstående frågor a – f med det alternativ som stämmer bäst för Dig*

|                                                      | Instämmer<br>helt        | Instämmer<br>nästan helt | Instämmer<br>delvis      | Instämmer<br>inte alls   |
|------------------------------------------------------|--------------------------|--------------------------|--------------------------|--------------------------|
| a. Jag har inga besvär.                              | <input type="checkbox"/> | <input type="checkbox"/> | <input type="checkbox"/> | <input type="checkbox"/> |
| b. Mina besvär påverkar mig inte särskilt mycket.    | <input type="checkbox"/> | <input type="checkbox"/> | <input type="checkbox"/> | <input type="checkbox"/> |
| c. Mina besvär begränsar min förmåga att vara aktiv. | <input type="checkbox"/> | <input type="checkbox"/> | <input type="checkbox"/> | <input type="checkbox"/> |
| d. Mina besvär är ett kroppsligt lidande.            | <input type="checkbox"/> | <input type="checkbox"/> | <input type="checkbox"/> | <input type="checkbox"/> |
| e. Mina anhöriga är oroliga.                         | <input type="checkbox"/> | <input type="checkbox"/> | <input type="checkbox"/> | <input type="checkbox"/> |
| f. Mina relationer till släkt och vänner påverkas.   | <input type="checkbox"/> | <input type="checkbox"/> | <input type="checkbox"/> | <input type="checkbox"/> |

**FRÅGEFORMULÄR OM FÖRVÄNTNINGAR**  
– Uppföljning 6 månader  
**EFTER KRANSKÄRLSRÖNTGEN**

---

**5. Hur mår Du idag jämfört med hur Du mårde för 6 månader?**

*Besvara bara **ETT** av följande alternativ.*

- |                                     |                          |
|-------------------------------------|--------------------------|
| a. Jag är helt återställd.          | <input type="checkbox"/> |
| b. Jag är nästan helt återställd.   | <input type="checkbox"/> |
| c. Jag är delvis återställd.        | <input type="checkbox"/> |
| d. Nej jag är inte alls återställd. | <input type="checkbox"/> |
| e. Jag har blivit sämre.            | <input type="checkbox"/> |

**6. Med den erfarenhet Du har nu vilket behandlingsmål känns mest relevant för de besvär/tillstånd du hade när du genomgick kranskärlsröntgen**

*Rangordna följande alternativ från 1- 6, skriv 1 för det som är viktigast 2 för det som är näst viktigast och så vidare*

- |                                                                              |                          |
|------------------------------------------------------------------------------|--------------------------|
| a. Att helt slippa besvär.                                                   | <input type="checkbox"/> |
| b. Att leva ett normalt liv och att kunna utföra önskvärda aktiviteter.      | <input type="checkbox"/> |
| c. Att ha god kunskap om orsaken till mina besvär/tillstånd.                 | <input type="checkbox"/> |
| d. Att veta om besvären/tillståndet innebär risk för framtida liv och hälsa. | <input type="checkbox"/> |
| e. Att besvären lindras.                                                     | <input type="checkbox"/> |
| f. Att minska oro och öka trygghet.                                          | <input type="checkbox"/> |

**7. Övriga synpunkter?**

.....

.....

.....

**Tack för Din medverkan!**
