# Supplementary material for: Patients expectations and fulfilment of expectations before and after treatment for suspected coronary artery disease assessed with a newly developed questionnaire in combination with established health-related quality of life questionnaires
Source: PubMed Central journal article supplement — Open Heart. 2017 Mar 6;4(1):e000529. doi: 10.1136/openhrt-2016-000529 (PMC5495177; doi:10.1136/openhrt-2016-000529), 2017-03-06
Supplement: openhrt-2016-000529supp004.pdf [file openhrt-2016-000529supp004.pdf]

# QUESTIONNAIRE ON EXPECTATIONS AFTER CORONARY ANGIOGRAPHY - 6-month follow-up

**Information about the questionnaire:**

By answering these questions you will help us find out if the expectations that you had before your coronary angiography about 6 months ago have been fulfilled.

**Instructions on how you should complete the questionnaire:**

Answer the questions by placing a cross in the box next to the statement that you feel best describes your case. If you are unsure, select the option that is closest.

**1. Which treatment/s have you received as a result of the coronary angiography you had about 6 months ago?**

|                                                                                                     |                          |
|-----------------------------------------------------------------------------------------------------|--------------------------|
| a. Lifestyle changes (consisting of e.g. smoking cessation, physical exercise and dietary changes). | <input type="checkbox"/> |
| b. Medical treatment only.                                                                          | <input type="checkbox"/> |
| c. Treatment with balloon angioplasty.                                                              | <input type="checkbox"/> |
| d. Treatment with bypass surgery.                                                                   | <input type="checkbox"/> |
| e. No treatment at all.                                                                             | <input type="checkbox"/> |
| f. Other treatment / surgery (e.g. valve surgery).                                                  | <input type="checkbox"/> |

**2. How have the expectations you had regarding examination, health care and treatment been met?**

*Answer **ALL** of the following questions, a-e, with the option that best applies to you.*

|                                                                                                    | Agree<br>entirely        | Agree<br>almost<br>entirely | Agree<br>partially       | Completely<br>disagree   |
|----------------------------------------------------------------------------------------------------|--------------------------|-----------------------------|--------------------------|--------------------------|
| a. The expectations I had regarding information before the examination and treatment have been met | <input type="checkbox"/> | <input type="checkbox"/>    | <input type="checkbox"/> | <input type="checkbox"/> |
| b. The expectations I had regarding my treatment have been met.                                    | <input type="checkbox"/> | <input type="checkbox"/>    | <input type="checkbox"/> | <input type="checkbox"/> |
| c. I have received treatment in a timely manner.                                                   | <input type="checkbox"/> | <input type="checkbox"/>    | <input type="checkbox"/> | <input type="checkbox"/> |
| d. The expectations I had regarding the way I would be received (by medical staff) have been met.  | <input type="checkbox"/> | <input type="checkbox"/>    | <input type="checkbox"/> | <input type="checkbox"/> |
| e. The expectations I had regarding feeling safe have been fulfilled                               | <input type="checkbox"/> | <input type="checkbox"/>    | <input type="checkbox"/> | <input type="checkbox"/> |

# QUESTIONNAIRE ON EXPECTATIONS AFTER CORONARY ANGIOGRAPHY - 6-month follow-up

### 3. How do you feel now, six months after your coronary angiography?

*Answer **ALL** of the following questions, a-d, with the option that best applies to you.*

|                                                         | Agree<br>entirely        | Agree<br>almost<br>entirely | Agree<br>partially       | Completely<br>disagree   |
|---------------------------------------------------------|--------------------------|-----------------------------|--------------------------|--------------------------|
| a. I feel well informed.                                | <input type="checkbox"/> | <input type="checkbox"/>    | <input type="checkbox"/> | <input type="checkbox"/> |
| b. I feel I have been well taken care of.               | <input type="checkbox"/> | <input type="checkbox"/>    | <input type="checkbox"/> | <input type="checkbox"/> |
| c. I feel I know where to turn if I should deteriorate. | <input type="checkbox"/> | <input type="checkbox"/>    | <input type="checkbox"/> | <input type="checkbox"/> |
| d. I feel safe.                                         | <input type="checkbox"/> | <input type="checkbox"/>    | <input type="checkbox"/> | <input type="checkbox"/> |

### 4. How significant are the symptoms that you had 6 months ago today?

*Answer **ALL** of the following questions, a-f, with the option that best applies to you.*

|                                                               | Agree<br>entirely        | Agree<br>almost<br>entirely | Agree<br>partially       | Completely<br>disagree   |
|---------------------------------------------------------------|--------------------------|-----------------------------|--------------------------|--------------------------|
| a. I have no symptoms.                                        | <input type="checkbox"/> | <input type="checkbox"/>    | <input type="checkbox"/> | <input type="checkbox"/> |
| b. My symptoms do not affect me much.                         | <input type="checkbox"/> | <input type="checkbox"/>    | <input type="checkbox"/> | <input type="checkbox"/> |
| c. My symptoms are limiting my ability to live an active life | <input type="checkbox"/> | <input type="checkbox"/>    | <input type="checkbox"/> | <input type="checkbox"/> |
| d. My symptoms are of a physical nature.                      | <input type="checkbox"/> | <input type="checkbox"/>    | <input type="checkbox"/> | <input type="checkbox"/> |
| e. My relatives are worried.                                  | <input type="checkbox"/> | <input type="checkbox"/>    | <input type="checkbox"/> | <input type="checkbox"/> |
| f. My relationships with family and friends are affected.     | <input type="checkbox"/> | <input type="checkbox"/>    | <input type="checkbox"/> | <input type="checkbox"/> |

**QUESTIONNAIRE ON EXPECTATIONS  
AFTER CORONARY ANGIOGRAPHY  
- 6-month follow-up**

---

**5. How are you feeling today compared to how you felt 6 months ago?**

*Answer only **ONE** of the following options.*

- a. I am completely recovered.
- b. I am almost completely recovered.
- c. I am partially recovered.
- d. I am not at all recovered.
- e. I have deteriorated.

**6. With your experience today, which treatment goal feels most relevant for the symptoms / conditions you had when you underwent coronary angiography?**

*Rank the following options from 1 to 6, write 1 for the most important option, 2 for the second most important, and so on.*

- a. To be completely free of symptoms.
- b. To live a normal life and be able to perform desirable activities.
- c. To have a good knowledge about my symptoms / condition.
- d. To know if the symptoms / conditions present a risk for my future life and health.
- e. To obtain relief from my symptoms.
- f. To reduce anxiety and increase a feeling of safety

**7. Other comments?**

.....

.....

.....

**Thank you for your participation!**
