# Supplementary material for: Patients expectations and fulfilment of expectations before and after treatment for suspected coronary artery disease assessed with a newly developed questionnaire in combination with established health-related quality of life questionnaires
Source: PubMed Central journal article supplement — Open Heart. 2017 Mar 6;4(1):e000529. doi: 10.1136/openhrt-2016-000529 (PMC5495177; doi:10.1136/openhrt-2016-000529), 2017-03-06
Supplement: openhrt-2016-000529supp005.pdf [file openhrt-2016-000529supp005.pdf]

**Supplementary Appendix V. Kappa value and percentage agreement.**

| Showing the percentage agreement and the $\kappa$ -value regarding the expectation questions in ExpQb and ExpQf |                                                                                                                         |                         |                 |
|-----------------------------------------------------------------------------------------------------------------|-------------------------------------------------------------------------------------------------------------------------|-------------------------|-----------------|
| <i>ExpQb</i>                                                                                                    | <i>Baseline</i>                                                                                                         | Percentage agreements % | $\kappa$ -value |
| <i>Q*</i>                                                                                                       |                                                                                                                         |                         |                 |
| 9a.                                                                                                             | I trust that I will receive all necessary information before any future treatment.                                      | 92.9%                   | 0.92            |
| 9b.                                                                                                             | I trust that I will receive the treatment that my condition requires                                                    | 92.9%                   | 0.92            |
| 9c.                                                                                                             | I trust that I will receive the treatment that I need in a timely manner..                                              | 78.6%                   | 0.64            |
| 9d.                                                                                                             | I trust that I will be well received (by medical staff) in connection with the examination, health care, and treatment. | 92.9%                   | 0.92            |
| 9e.                                                                                                             | I trust that I will be able to feel safe in connection with the examination, health care and treatment that I receive   | 78.6%                   | -10             |
| 10a.                                                                                                            | I expect to be completely recovered / I hope to be completely fine.                                                     |                         |                 |
| 10b.                                                                                                            | I expect to be almost fully recovered / I hope to improve even if I am not entirely fine.                               | 78.6                    | 0.60            |
| 10c.                                                                                                            | I expect to be only partially recovered / I hope to get somewhat better.                                                |                         |                 |
| 10d.                                                                                                            | I expect no improvement at all / I have no hopes of getting better.                                                     |                         |                 |
| <i>ExpQf</i>                                                                                                    | <i>Follow-up</i>                                                                                                        |                         |                 |
| <i>Q**</i>                                                                                                      |                                                                                                                         |                         |                 |
| 2a.                                                                                                             | The expectations I had regarding information before the examination and treatment have been met.                        | 84.6%                   | 0.30            |
| 2b.                                                                                                             | The expectations I had regarding my treatment have been met                                                             | 84.6%                   | 0.77            |
| 2c.                                                                                                             | I have received treatment in a timely manner.                                                                           | 76.9%                   | 0.66            |
| 2d.                                                                                                             | The expectations I had regarding the way I would be received (by medical staff) have been met.                          | 100%                    | 1.0             |
| 2e.                                                                                                             | The expectations I had regarding feeling safe have been fulfilled                                                       | 84.6%                   | 0.71            |
| 3a.                                                                                                             | I feel well informed                                                                                                    | 71.4%                   | 0.47            |
| 3b.                                                                                                             | I feel I have been well taken care of.                                                                                  | 76.9%                   | 0.80            |
| 3c.                                                                                                             | I feel safe                                                                                                             | 100%                    | 1.0             |
| 3d.                                                                                                             | I feel I know where to turn if I should deteriorate.                                                                    | 84.6%                   | 0.73            |
| 5a.                                                                                                             | I am fully r recovered.                                                                                                 |                         |                 |
| 5b.                                                                                                             | I am almost completely recovered                                                                                        |                         |                 |
| 5c.                                                                                                             | I am partially recovered.                                                                                               | 92.3%                   | 0.90            |
| 5d.                                                                                                             | I am not at all recovered.                                                                                              |                         |                 |
| 5e.                                                                                                             | I am fully recovered.                                                                                                   |                         |                 |

Abbreviations: ExpQb= expectation questionnaire at baseline, Expf =expectation questionnaire at follow-up,  $\kappa$ = kappa measure of agreement. Value of  $\kappa$  <0.20=poor agreement, 0.21-0.40=fair agreement, 0.41-0.60=moderate agreement, 0.61-0.80=good agreement, 0.80-1.0=very good agreement.  
 \*=question baseline, \*\*=question follow up.
