# Supplementary material for: Patients expectations and fulfilment of expectations before and after treatment for suspected coronary artery disease assessed with a newly developed questionnaire in combination with established health-related quality of life questionnaires
Source: PubMed Central journal article supplement — Open Heart. 2017 Mar 6;4(1):e000529. doi: 10.1136/openhrt-2016-000529 (PMC5495177; doi:10.1136/openhrt-2016-000529), 2017-03-06
Supplement: openhrt-2016-000529supp006.pdf [file openhrt-2016-000529supp006.pdf]

### Supplementary Appendix VI

The patients ranking of what is most important to them at baseline and at follow-up.

| <b>Baseline/Follow-up<br/>ExpQb/ExpQf</b> |                                                                                   | <b>Baseline<br/>n-544</b> |          | <b>Follow-up<br/>n-505</b> |          |
|-------------------------------------------|-----------------------------------------------------------------------------------|---------------------------|----------|----------------------------|----------|
|                                           |                                                                                   | <b>n</b>                  | <b>%</b> | <b>n</b>                   | <b>%</b> |
| 11a / 6a.                                 | To be completely free of symptoms                                                 | 197                       | 41.7     | 174                        | 39.5     |
| 11b / 6b.                                 | To live a normal life and be able to perform desirable activities.                | 183                       | 38.8     | 203                        | 46.1     |
| 11c / 6c.                                 | To have a good knowledge about my symptoms / condition.                           | 35                        | 7.4      | 15                         | 3.4      |
| 11d/6d.                                   | To know if the symptoms / conditions present a risk for my future life and health | 22                        | 4.7      | 22                         | 5.0      |
| 11e/6e.                                   | To obtain relief from my symptoms                                                 | 10                        | 2.1      | 14                         | 3.2      |
| 11f/6f.                                   | To reduce anxiety and increase a feeling of safety                                | 25                        | 5.3      | 12                         | 2.7      |

Abbreviations: ExpQb =expectation questionnaire at baseline, ExpQf =expectation questionnaire at follow-up,
